# Supplementary material
Source: ML conference proceedings conference paper supplement (https://openaccess.thecvf.com/content/WACV2024/html/Rahman_MIST_Medical_Image_WACV_2024_paper.html)
Supplement: Supplementary file 1 [file Rahman_MIST_Medical_Image_WACV_2024_supplemental.pdf]

Table 1. We conducted an ablation study with various arrangements to assess the impacts of MSA projection, dilation and attention aggregation in SWC, and the use of attention mixing on segmentation performance over the Synapse-multi organ dataset. To do this, we tested attention-mixing with both yes and no options, linear or convolutional MSA projection, dilations of 1,2 or 2,3, and attention-aggregation with either summation or concatenation. We performed 16 experiments by combining all possible configurations and found that the optimal setup (highlighted in bold) with the highest performance includes attention mixing, convolutional projected MSA, dilation of 2,3, and concatenation of attention in the SWC block.

| Attention-mixing | MSA Projection     | Dilations  | Attention-aggregation | Mean         |              |
|------------------|--------------------|------------|-----------------------|--------------|--------------|
|                  |                    |            |                       | DICE         | HD95         |
| Yes              | Linear             | 1,2        | Summation             | 83.64        | 14.79        |
| Yes              | Linear             | 1,2        | Concatenation         | 84.98        | 14.08        |
| Yes              | Linear             | 2,3        | Summation             | 85.03        | 13.48        |
| Yes              | Linear             | 2,3        | Concatenation         | 84.87        | 13.15        |
| Yes              | Convolution        | 1,2        | Summation             | 83.32        | 15.01        |
| Yes              | Convolution        | 1,2        | Concatenation         | 86.23        | 12.65        |
| Yes              | Convolution        | 2,3        | Summation             | 85.43        | 12.01        |
| <b>Yes</b>       | <b>Convolution</b> | <b>2,3</b> | <b>Concatenation</b>  | <b>86.95</b> | <b>11.08</b> |
| No               | Linear             | 1,2        | Summation             | 83.45        | 15.28        |
| No               | Linear             | 1,2        | Concatenation         | 84.06        | 14.87        |
| No               | Linear             | 2,3        | Summation             | 84.32        | 15.34        |
| No               | Linear             | 2,3        | Concatenation         | 85.09        | 13.97        |
| No               | Convolution        | 1,2        | Summation             | 83.67        | 16.54        |
| No               | Convolution        | 1,2        | Concatenation         | 84.32        | 14.74        |
| No               | Convolution        | 2,3        | Summation             | 83.69        | 15.65        |
| No               | Convolution        | 2,3        | Concatenation         | 83.81        | 14.11        |

Table 2. Evaluation of Interpolation Effects on Performance (with Optimal Settings in other aspects): Bilinear interpolation demonstrates the highest Dice score and the lowest HD95 among the different interpolation methods.

| Interpolations  | Mean         |              |
|-----------------|--------------|--------------|
|                 | DICE         | HD95         |
| <b>Bilinear</b> | <b>86.95</b> | <b>11.08</b> |
| Area            | 84.32        | 15.63        |
| Bicubic         | 84.60        | 14.31        |
| Nearest-exact   | 84.13        | 14.87        |

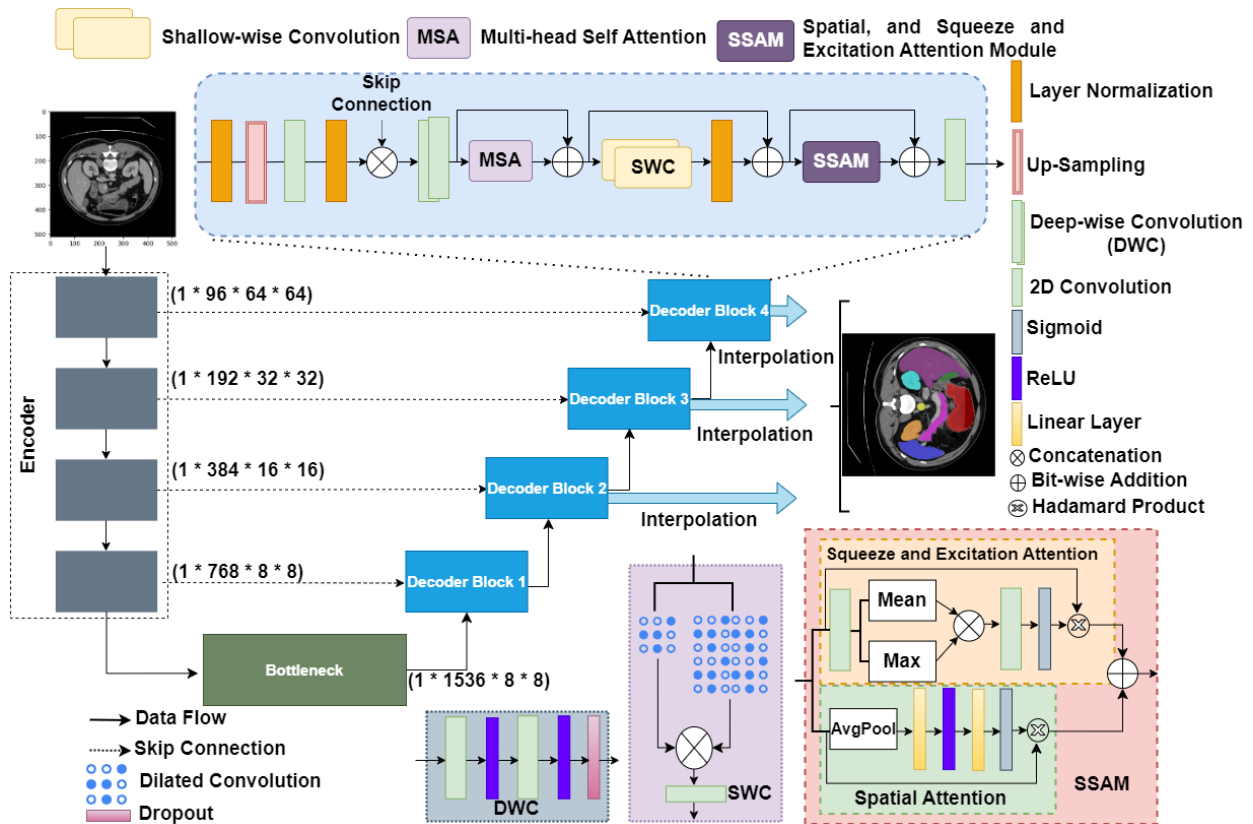

Figure 1. Medical Image Segmentation Transformer (MIST): **The figure shows the decoder blocks without mixing attentions.** The left side represents the encoder, utilizing a pre-trained MaxViT model. On the right side, the decoder generates segmentation maps. Each decoder block incorporates a convolutional projected MSA (Multi-head Self-Attention) to reduce computational cost and capture salient features. Additionally, depth-wise (deep and shallow) convolutions (DWC and SWC) are incorporated to extract relevant semantic features and enhance the kernel's receptive field, facilitating better long-range dependency.
